# Supplementary material for: Maternal knowledge, attitudes and practices related to neonatal jaundice and associated factors in Shenzhen, China: a facility-based cross-sectional study
Source: HighWire-hosted journal article supplement (doi:10.1136/bmjopen-2021-057981), 2022-08-01

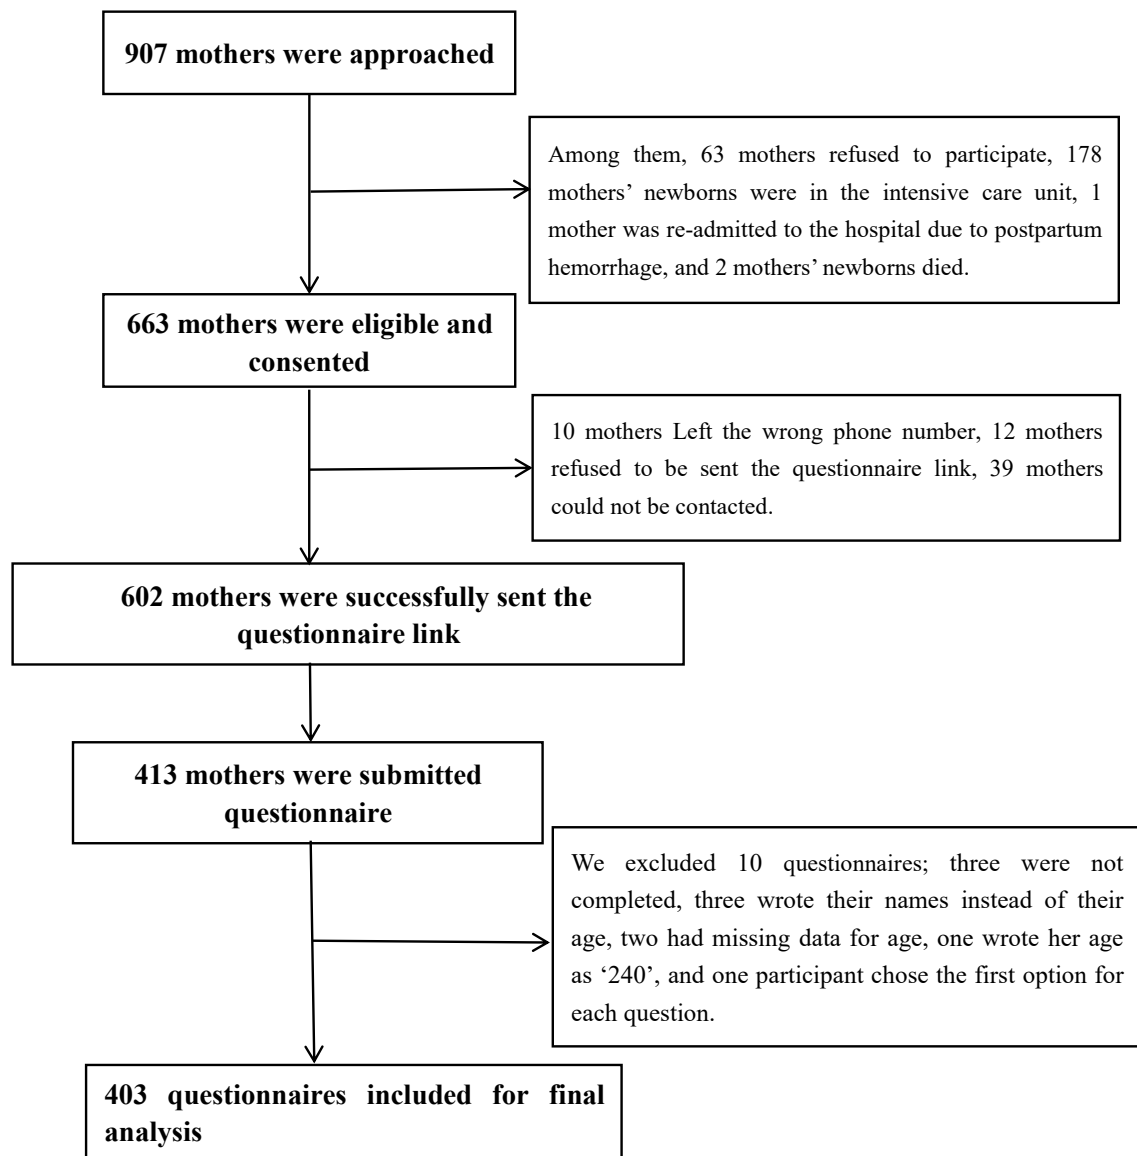

Supplement: bmjopen-2021-057981supp001_data_supplement.pdf [file bmjopen-2021-057981supp001_data_supplement.pdf]
