# Supplementary material for: Maternal knowledge, attitudes and practices related to neonatal jaundice and associated factors in Shenzhen, China: a facility-based cross-sectional study
Source: HighWire-hosted journal article supplement (doi:10.1136/bmjopen-2021-057981), 2022-08-01
Supplement: bmjopen-2021-057981supp002_data_supplement.pdf [file bmjopen-2021-057981supp002_data_supplement.pdf]

**Supplementary table 1. Chi-square analyses of maternal knowledge, attitudes and practices related to neonatal jaundice (N=403)**

| Variables                                                           | Knowledge*             |               | Attitude*    |              | Behaviour*   |              |              |
|---------------------------------------------------------------------|------------------------|---------------|--------------|--------------|--------------|--------------|--------------|
|                                                                     | $\chi^2$               | <i>p</i>      | $\chi^2$     | <i>p</i>     | $\chi^2$     | <i>p</i>     |              |
| <b>Sociodemographic data</b>                                        |                        |               |              |              |              |              |              |
| Age(years)                                                          | 19~27                  |               |              |              |              |              |              |
|                                                                     | 28~32                  | 2.008         | 0.366        | 1.385        | 0.500        | 0.292        | 0.864        |
|                                                                     | 33~45                  |               |              |              |              |              |              |
| Blood group                                                         | O                      |               |              |              |              |              |              |
|                                                                     | A                      | 1.668         | 0.644        | 3.873        | 0.276        | 4.244        | 0.236        |
|                                                                     | B                      |               |              |              |              |              |              |
|                                                                     | AB                     |               |              |              |              |              |              |
| Education level                                                     | High school and below  |               |              |              |              |              |              |
|                                                                     | University             | <b>16.921</b> | <b>0.000</b> | <b>9.800</b> | <b>0.007</b> | <b>6.084</b> | <b>0.048</b> |
|                                                                     | Postgraduate and above |               |              |              |              |              |              |
| Occupation                                                          | Employed               |               |              |              |              |              |              |
|                                                                     | Self-employed          | <b>15.279</b> | <b>0.002</b> | 2.007        | 0.571        | 6.865        | 0.076        |
|                                                                     | Housewife              |               |              |              |              |              |              |
|                                                                     | Others                 |               |              |              |              |              |              |
| Average family monthly income (RMB)                                 | ≤5000                  |               |              |              |              |              |              |
|                                                                     | 5001~10000             |               |              |              |              |              |              |
|                                                                     | 10001~20000            | <b>10.444</b> | <b>0.034</b> | 6.849        | 0.144        | 8.683        | 0.070        |
|                                                                     | 20001~30000            |               |              |              |              |              |              |
| Time from the place of residence to the delivery hospital (minutes) | ≥30001                 |               |              |              |              |              |              |
|                                                                     | ≤10                    |               |              |              |              |              |              |
|                                                                     | 10~30                  | 1.458         | 0.692        | 3.289        | 0.349        | 1.635        | 0.652        |
|                                                                     | 30~60                  |               |              |              |              |              |              |
| ≥60                                                                 |                        |               |              |              |              |              |              |
|                                                                     |                        |               |              |              |              |              |              |
| <b>Delivery history</b>                                             |                        |               |              |              |              |              |              |
| Parity                                                              | Primiparous            | 0.021         | 0.885        | <b>4.536</b> | <b>0.033</b> | 0.629        | 0.428        |
|                                                                     | Multipara              |               |              |              |              |              |              |
| Delivery mode                                                       | Spontaneous vaginal    | 0.014         | 0.907        | 0.152        | 0.696        | 0.500        | 0.479        |
|                                                                     | Caesarean section      |               |              |              |              |              |              |
| <b>Infant's Information</b>                                         |                        |               |              |              |              |              |              |
| Sex                                                                 | Male                   | <b>6.409</b>  | <b>0.011</b> | 2.241        | 0.134        | 0.804        | 0.370        |
|                                                                     | Female                 |               |              |              |              |              |              |

|                                                                                      |                           |              |              |               |              |               |              |
|--------------------------------------------------------------------------------------|---------------------------|--------------|--------------|---------------|--------------|---------------|--------------|
|                                                                                      | Low                       |              |              |               |              |               |              |
| Birth weight <sup>1</sup>                                                            | Normal                    | 1.008        | 0.615        | 2.034         | 0.402        | 4.216         | 0.130        |
|                                                                                      | Hight                     |              |              |               |              |               |              |
|                                                                                      | Exclusive breastfeeding   |              |              |               |              |               |              |
| Feeding way                                                                          | Mixed feeding             | 5.479        | 0.065        | 0.873         | 0.647        | 5.604         | 0.062        |
|                                                                                      | Exclusive Formula-feeding |              |              |               |              |               |              |
|                                                                                      | Yes                       |              |              |               |              |               |              |
| Cranial hematoma <sup>2</sup>                                                        | No                        | <b>7.288</b> | <b>0.026</b> | 0.342         | 0.843        | 0.380         | 0.827        |
|                                                                                      | Not sure                  |              |              |               |              |               |              |
| Whether to pass meconium with in 24 hours                                            | Yes                       | 0.052        | 0.820        | 1.626         | 0.202        | 3.247         | 0.072        |
|                                                                                      | No                        |              |              |               |              |               |              |
| Predischarge bilirubin level                                                         | Normal                    | 1.253        | 0.263        | 0.022         | 0.882        | 1.837         | 0.175        |
|                                                                                      | Hight                     |              |              |               |              |               |              |
| "yuesao" <sup>3</sup>                                                                | Yes                       | 1.067        | 0.320        | <b>11.878</b> | <b>0.001</b> | 0.327         | 0.567        |
|                                                                                      | No                        |              |              |               |              |               |              |
| <b>Previous experience/exposure to NNJ</b>                                           |                           |              |              |               |              |               |              |
| Prior health education on neonatal jaundice                                          | Yes                       | <b>8.824</b> | <b>0.003</b> | 0.179         | 0.672        | <b>9.236</b>  | <b>0.002</b> |
|                                                                                      | No                        |              |              |               |              |               |              |
| Previous child history of neonataljaundice                                           | Yes                       | 1.067        | 0.302        | 0.140         | 0.708        | 0.133         | 0.715        |
|                                                                                      | No                        |              |              |               |              |               |              |
| Current child admitted to the hospital for treatment due to jaundice after discharge | Yes                       |              |              |               |              |               |              |
|                                                                                      | No                        | 0.358        | 0.549        | 0.012         | 0.912        | 3.156         | 0.076        |
| Family history/friends with NNJ history (N=373)                                      | Yes                       | 0.351        | 0.554        | 0.100         | 0.752        | 0.860         | 0.354        |
|                                                                                      | No                        |              |              |               |              |               |              |
| Mother's knowledge level                                                             | good                      |              | <i>NA</i>    | <b>9.478</b>  | <b>0.002</b> | <b>35.751</b> | <b>0.000</b> |
|                                                                                      | poor                      |              |              |               |              |               |              |
| Mother's attitude level                                                              | good                      |              | <i>NA</i>    |               | <i>NA</i>    | <b>7.179</b>  | <b>0.007</b> |
|                                                                                      | poor                      |              |              |               |              |               |              |

**Note:** *NA*, not applicable. \*Knowledge attitude and behaviour were all divided into two levels (poor or good)
